# Supplementary material for: A micromotor based on polymer single crystals and nanoparticles: toward functional versatility
Source: Royal Society of Chemistry journal article supplement (doi:10.1039/c4nr02593h), 2014-01-01
Supplement: c4nr02593h1.pdf [file c4nr02593h1.pdf]

## Electronic Supplementary Information (ESI)

### Micromotor Based on Polymer Single Crystal and Nanoparticle: Toward Functional Versatility

Mei Liu,<sup>a</sup> Limei Liu,<sup>a</sup> Wenlong Gao,<sup>a</sup> Miaoda Su,<sup>a</sup> Ya Ge,<sup>a</sup> Lili Shi,<sup>a</sup> Hui Zhang,<sup>a</sup> Bin Dong\*<sup>a</sup> and

Christopher Y. Li\*<sup>b</sup>

<sup>a</sup>Institute of Functional Nano & Soft Materials (FUNSOM) & Collaborative Innovation Center for Suzhou Nano Science and Technology, Jiangsu Key Laboratory for Carbon-Based Functional Materials & Devices, Soochow University, Suzhou 215123 (P. R. China). E-mail: bdong@suda.edu.cn

<sup>b</sup>Department of Materials Science and Engineering, Drexel University, Philadelphia, PA 19104 (USA), E-mail: chrisli@drexel.edu

## Experimental Section

*Materials:* AuCl<sub>3</sub>, ε-caprolactone, 2-mercaptoethanol, Candida antarctica lipase B (CALB), silver enhancer kit, lipase from Pseudomonas cepacia, 1-butanol, pentyl acetate, Rhodamine B isothiocyanate, Rhodamine 6G (R6G), 10 nm iron oxide nanoparticle (Fe<sub>3</sub>O<sub>4</sub>NP) and hydrogen peroxide were obtained from Sigma Aldrich Company. Thiol end-functionalized polycaprolactone (PCL-SH) and 6 nm AuNP were synthesized following literature methods.<sup>1,2</sup>

*Fabrication Methods:* Polymer single crystals were prepared using a self-seeding technique.<sup>3</sup> In brief, PCL-SH (9 mg) was first dissolved in 1-butanol (30 g) at 60 °C for 10 min, after which, the solution was cooled to 5 °C and isothermally crystallized at 5 °C for 2 h. The crystal seeds were obtained by re-heating the solution to 46 °C for 10 min. Polymer single crystals were formed by allowing the above solution to crystallize at 22 °C for 24 h. Uncrystallized polymers were removed by isothermal filtration. To attach 6 nm AuNP, the solvent for polymer single crystal was first exchanged from 1-butanol to pentyl acetate by centrifugation method. Then, AuNP solution was mixed with polymer single crystal's pentyl acetate solution with 1 to 5 weight ratio and stirred for 24 h. Free AuNPs were removed by centrifugation. Ag-PCL was obtained by treating this AuNP-decorated polymer single crystal with silver enhancer kit.<sup>4,5</sup> Centrifugation was utilized to remove free AgNP in water. The final Ag-PCL is dispersed in water or PBS buffer for further micromotor study. To attach Fe<sub>3</sub>O<sub>4</sub>NP, Fe<sub>3</sub>O<sub>4</sub>NP's toluene solution was mixed with Ag-PCL's pentyl acetate solution with 1 to 10 weight ratio for 24 hrs. Excess Fe<sub>3</sub>O<sub>4</sub>NPs were removed by centrifugation. The introduction of RhBITC onto Ag-PCL surface was achieved by mixing Ag-PCL with 2 mM RhBITC aqueous solution for 12 h.<sup>6</sup> Un-attached RhBITC molecules were removed by centrifugation process. The enzymatic disassembly is done by mixing Ag-PCL or Ag-PCL-RhBITC

with lipase from *Pseudomonas cepacia* in PBS buffer at 37 °C.<sup>7,8</sup> After different periods of time, Ag-PCL or Ag-PCL-RhBITC is sampled and analyzed using TEM or fluorescence microscopy.

*Characterizations:* UV-Vis spectra were carried out on a Lambda 750 Spectrometer. TEM experiments were performed on a FEI Tecnai-F20 TEM operated at an acceleration voltage of 200 kV. TEM sample was prepared by drop-casting single crystal suspension on a carbon-coated nickel grid. Solvent was allowed to evaporate before TEM examination. For micromotor study, Ag-PCL is first placed in water or PBS buffer containing H<sub>2</sub>O<sub>2</sub>. The motion is then observed and recorded by a Nikon Eclipse 80i microscope. The motion analysis for the captured video is done using PhysVis software. The remote control under magnetic field is realized by placing a neodymium (NdFeB) magnet 5 cm far from the sample. Fluorescent images were captured using a Leica DM4000M fluorescence microscope. AFM image was obtained on a Bruker Dimension Scanning Probe Microscope. SERS experiment was performed on a Horiba Jobin Yvon LabRAM HR800 Raman spectrometer. The 633 nm excitation laser was focused on Ag-PCL dispersed in solutions containing different concentrations of R6G through a long working distance 50× objective to a spot size of approximately 2 μm. The acquisition time for all spectra was 1 s.

**Video S1:** An individual Ag-PCL micromotor moving autonomously in circles.

**Video S2:** Large area view of the movement of Ag-PCL in 10% H<sub>2</sub>O<sub>2</sub> aqueous solution.

**Video S3:** Autonomous movement of Ag-PCL in 1× PBS buffer containing 10% H<sub>2</sub>O<sub>2</sub>.

**Video S4:** Remote control of Ag-PCL with attached Fe<sub>3</sub>O<sub>4</sub>NP by applying an external magnetic field.

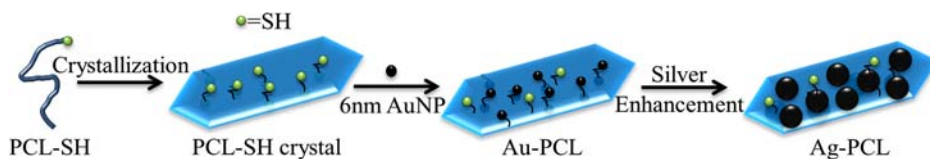

**Fig. S1** Schematic illustration showing the fabrication process of Ag-PCL.

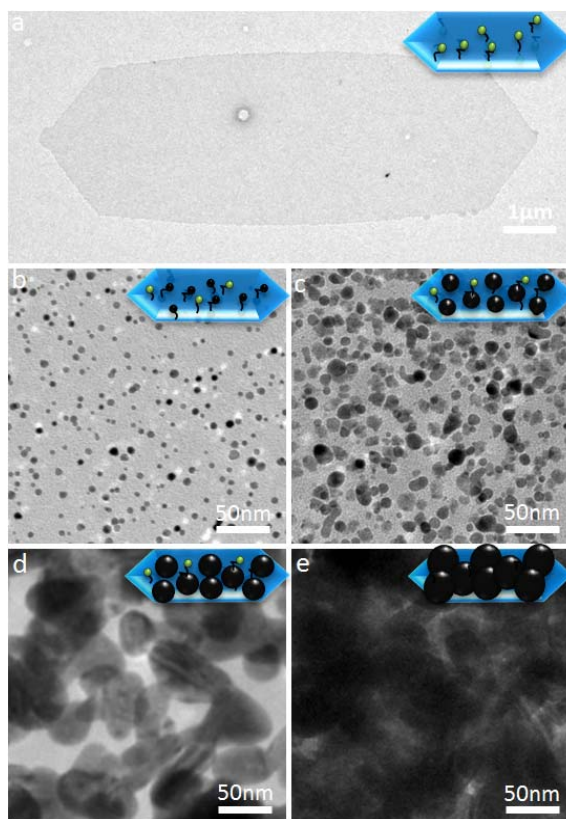

**Fig. S2** TEM images of PCL-SH single crystal before (a) and after (b) AuNP decoration. TEM images of AuNP decorated PCL-SH after (c) 1 min, (d) 3 min and (e) 5 min silver enhancement.

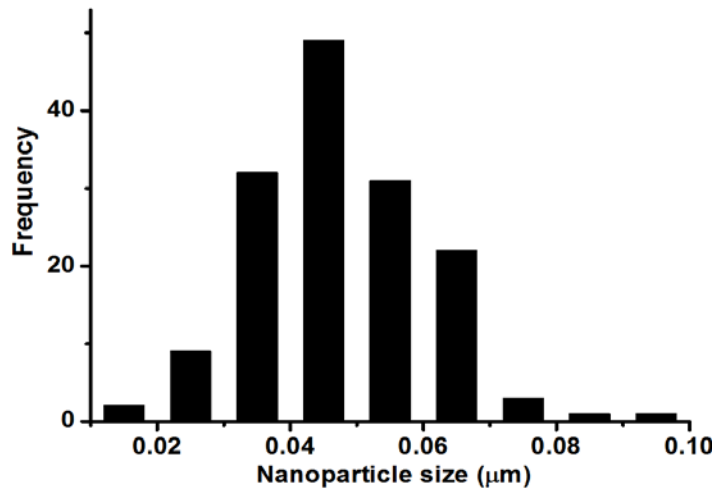

**Fig. S3** Size distribution histogram of AgNPs measured from Fig. 1b in the main text.

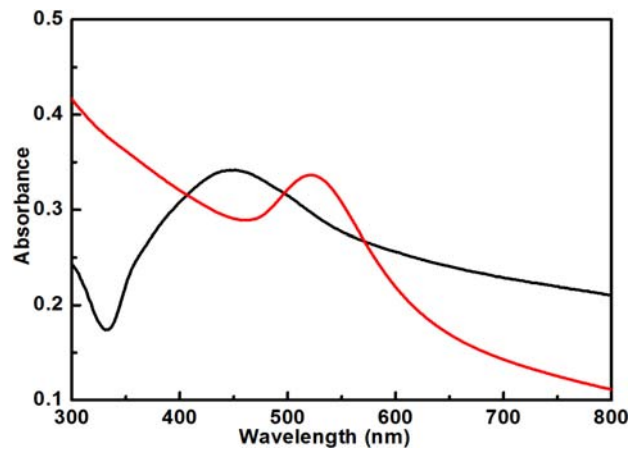

**Fig. S4** UV-Vis spectra of AuNP decorated PCL-SH (red curve) and AuNP decorated PCL-SH after 3 min silver enhancement (black curve).

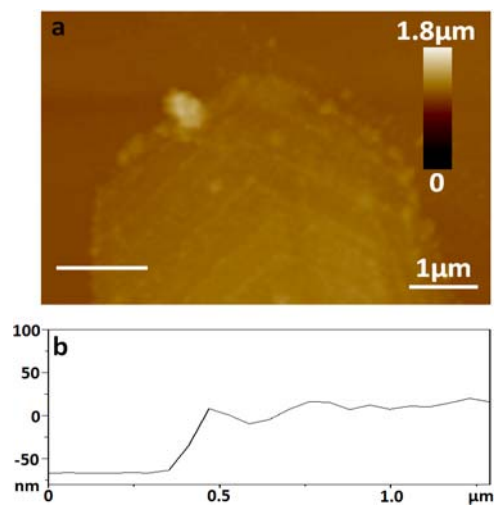

**Fig. S5** (a) AFM image of Ag-PCL. (b) AFM cross section analysis of (a).

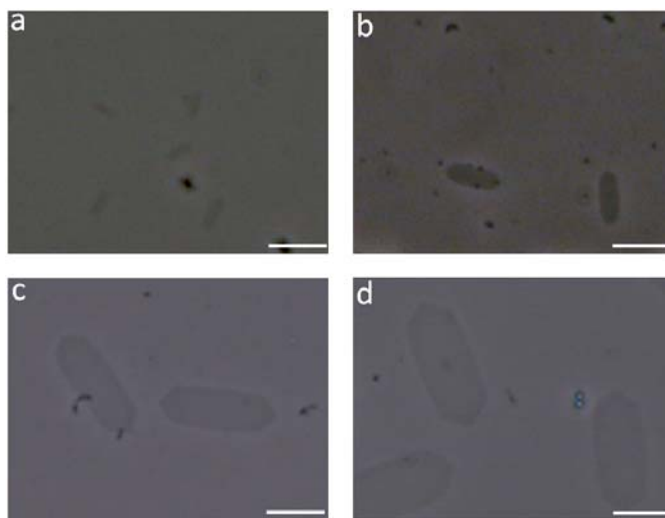

**Fig. S6** Polymer single crystal grown at different seeding temperature (a) 44 °C (b) 45 °C (c) 46 °C (d) 47 °C. Scale bar: 5 μm.

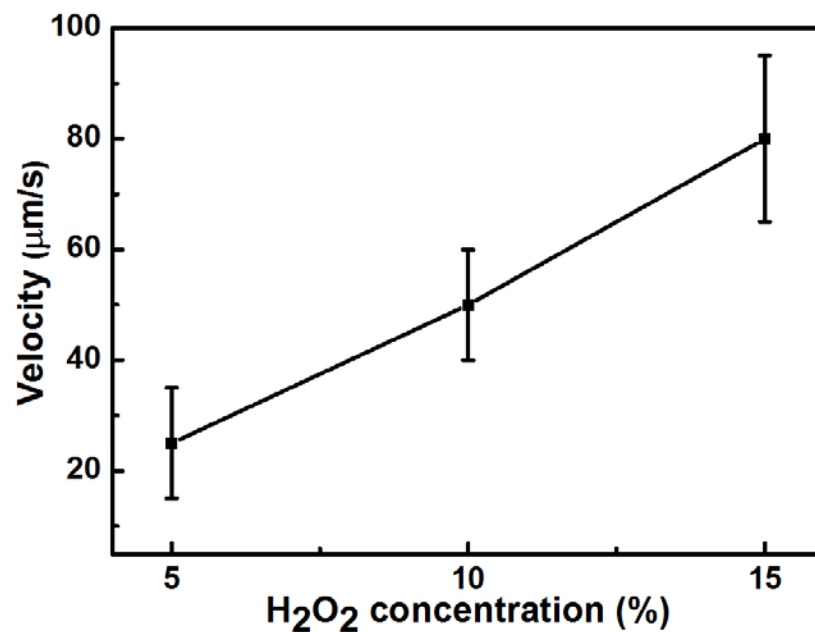

**Fig. S7** Velocity of Ag-PCL micromotor at different H<sub>2</sub>O<sub>2</sub> concentrations. Error bars indicate the standard deviation.

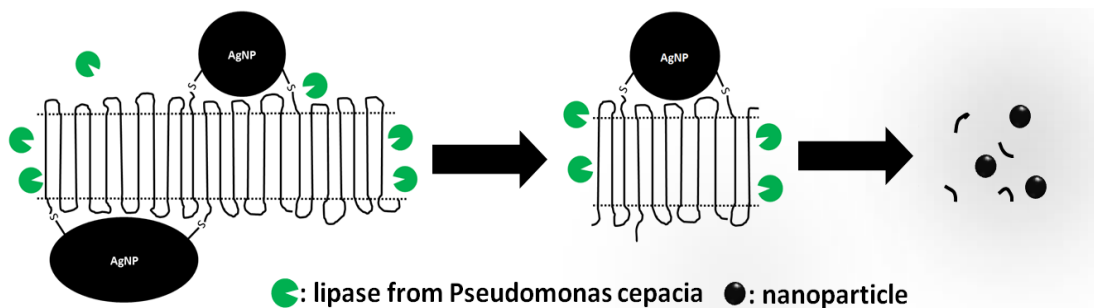

**Fig. S8** Schematic illustration showing the enzymatic disassembly of Ag-PCL.

## Supplementary References

1. C. Hedfors, E. Ostmark, E. Malmstrom, K. Hult and M. Martinelle, *Macromolecules*, 2005, **38**, 647-649.
2. N. R. Jana and X. G. Peng, *J. Am. Chem. Soc.*, 2003, **125**, 14280-14281.
3. B. Dong, W. D. Wang, D. L. Miller and C. Y. Li, *J. Mater. Chem.*, 2012, **22**, 15526-15529.
4. T. A. Taton, C. A. Mirkin and R. L. Letsinger, *Science*, 2000, **289**, 1757-1760.
5. Y. W. C. Cao, R. C. Jin and C. A. Mirkin, *Science*, 2002, **297**, 1536-1540.
6. A. Breier and A. Ziegelhoffer, *Gen. Physiol. Biophys.*, 2000, **19**, 253-263.
7. Z. H. Gan, Q. Z. Liang, J. Zhang and X. B. Jing, *Polym. Degrad. Stab.*, 1997, **56**, 209-213.
8. Z. H. Gan, D. H. Yu, Z. Y. Zhong, Q. Z. Liang and X. B. Jing, *Polymer*, 1999, **40**, 2859-2862.
